# Supplementary material for: A HAND to TBX5 Explains the Link Between Thalidomide and Cardiac Diseases
Source: PubMed Central journal article supplement (PMC5431093; doi:10.1038/s41598-017-01641-3), 2017-05-03

## **A HAND to TBX5 Explains the Link Between Thalidomide and Cardiac Diseases**

**Running Title: The HAND2 and TBX5 Pathway in the Heart**

**Athar Khalil<sup>1</sup>, Rachel Tanos<sup>1</sup>, Nehmé El-Hachem<sup>1,6</sup>, Mazen Kurban<sup>1,3,4</sup>, Patrice Bouvagnet<sup>5</sup>, Fadi Bitar<sup>1,2</sup>,  
and Georges Nemer<sup>1,\*</sup>**

Departments of <sup>1</sup>Biochemistry and Molecular Genetics, <sup>2</sup>Pediatrics and Adolescent Medicine, and  
<sup>3</sup>Dermatology, American University of Beirut, Beirut, Lebanon

<sup>4</sup>Department of Dermatology, Columbia University, New York, NY, USA

<sup>5</sup>Laboratoire Cardiogénétique, INMG, CNRS UMR 5310, INSERM U1217 and Université Lyon 1, Lyon,  
France

<sup>6</sup> Integrative systems biology/bioinformatics, IRCM, Montreal, Montreal, Canada

**Supplementary Table 1: Phenotype/Genotype of the extended family members for the p.G202V HAND2 variant**

**Supplementary Figure 1: Differential interaction of Thalidomide with TBX3 versus TBX5**

The corresponding protein-ligand interaction diagram shows the most relevant amino acid within 5 Angstroms of thalidomide. Note the different amino acids between TBX3 and TBX5 that get in close proximity to thalidomide. All amino acids that are implicated in the interaction with Thalidomide are listed in yellow.

**Supplementary Figure 2: Expression of TBX5 proteins used in EMSA**

15 micrograms of nuclear extracts from HEK293 cells overexpressing HA-tagged TBX5 were resolved on a denaturing gel under different conditions (control, DMSO, and Thalidomide). Western blot with HA polyclonal rabbit antibody shows equal amount of proteins under all conditions.

**Supplementary Figure 3: MTT assay on HEK293 cells treated with Thalidomide**

The data are represented of %cell survival over 24 hours after treatment with Thalidomide (4 $\mu$ M) or DMSO. The numbers represent the mean  $\pm$  Standard deviation for 3 experiments done in triplicate.

**Supplementary Figure 4: Genetic analysis of the p.G202V variant within the large affected family**

The pedigree includes all individuals over 6 generations (roman numbers). All coded DNA samples numbers (arabic) are underneath each corresponding individual. Those individuals whom we have a “hear-say” account from family members are given roman numbers. The rest are not numbered.

Supplementary Table 1: Phenotype/Genotype of the extended family members for the p.G202V HAND2 variant

| Patient ID | Phenotype     | HAND2-p.G202V |
|------------|---------------|---------------|
| 78         |               | -             |
| 79         |               | +             |
| 80         | TOF           | +             |
| 81         |               | -             |
| 82         | TOF           | +             |
| 890        |               | -             |
| 891        |               | -             |
| 892        |               | -             |
| 894        |               | -             |
| 895        |               | -             |
| 896        |               | -             |
| 897        |               | -             |
| 898        |               | -             |
| 899        |               | -             |
| 900        |               | +             |
| 901        |               | -             |
| 902        |               | -             |
| 903        | VSD           | -             |
| 904        | CAD           | -             |
| 905        |               | -             |
| 906        |               | +             |
| 907        |               | -             |
| 908        | TOF like + PA | +             |
| 909        |               | -             |
| 910        |               | -             |
| 911        |               | -             |
| 912        |               | -             |
| 913        |               | -             |
| 914        |               | -             |
| 915        |               | -             |
| 916        |               | -             |
| 917        |               | -             |
| 918        |               | +             |
| 919        |               | +             |
| 920        |               | -             |
| 921        |               | -             |
| 922        |               | -             |
| 923        |               | -             |
| 335        |               | +             |
| 925        |               | -             |
| 926        |               | -             |
| 227        | AS            | +             |
| 228        |               | -             |
| 229        | CoA           | +             |
| 427        |               | -             |
| 429        | CAD           | +             |
| 334        |               | -             |
| 55         | CAD           | +             |
| 426        | CAD           | +             |
| 431        | CAD           | +             |
| 57         | PDA + VSD     | -             |

TOF: Tetralogy of Fallot  
VSD: Ventricular Septal Defect  
CAD: Coronary Artery Disease  
PA: Pulmonary Atresia  
AS: Aortic Stenosis  
CoA: Coarctation of the Aorta  
PDA: Patent Ductus Arteriosus

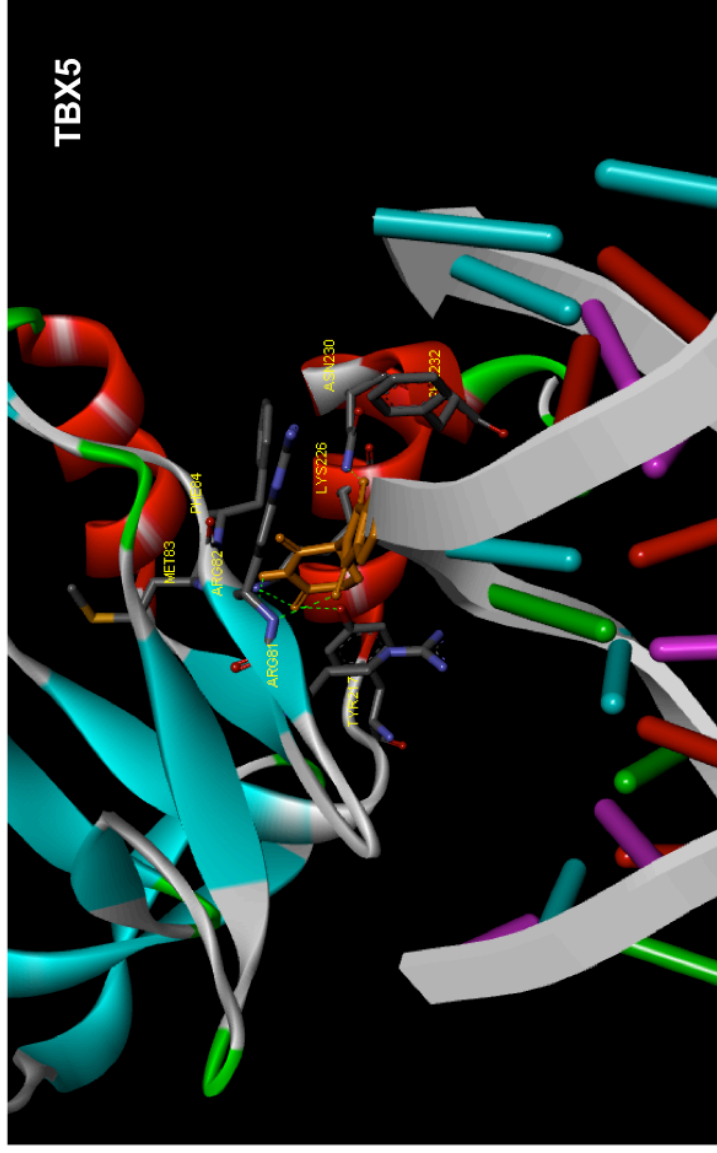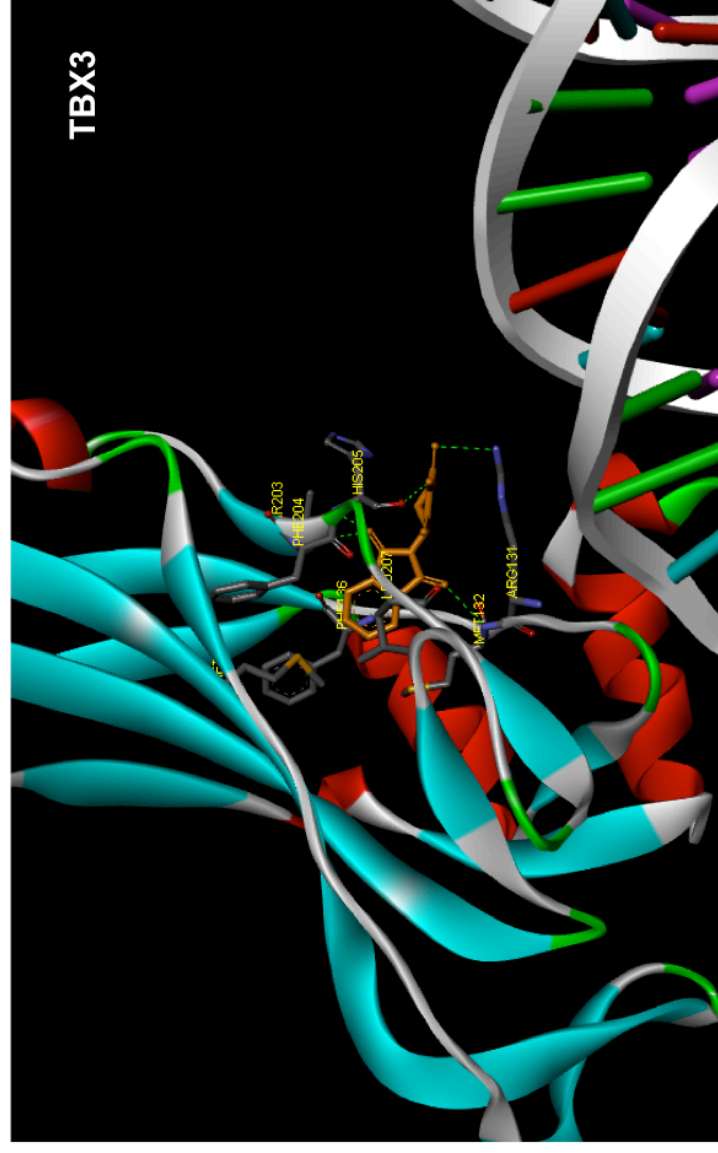

Supplementary Figure 1, Khalil A et al

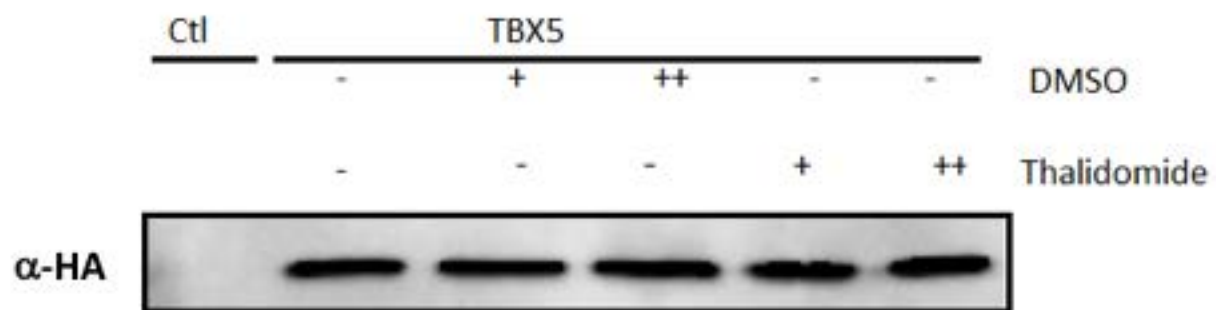

Supp Figure 2, Khalil et al

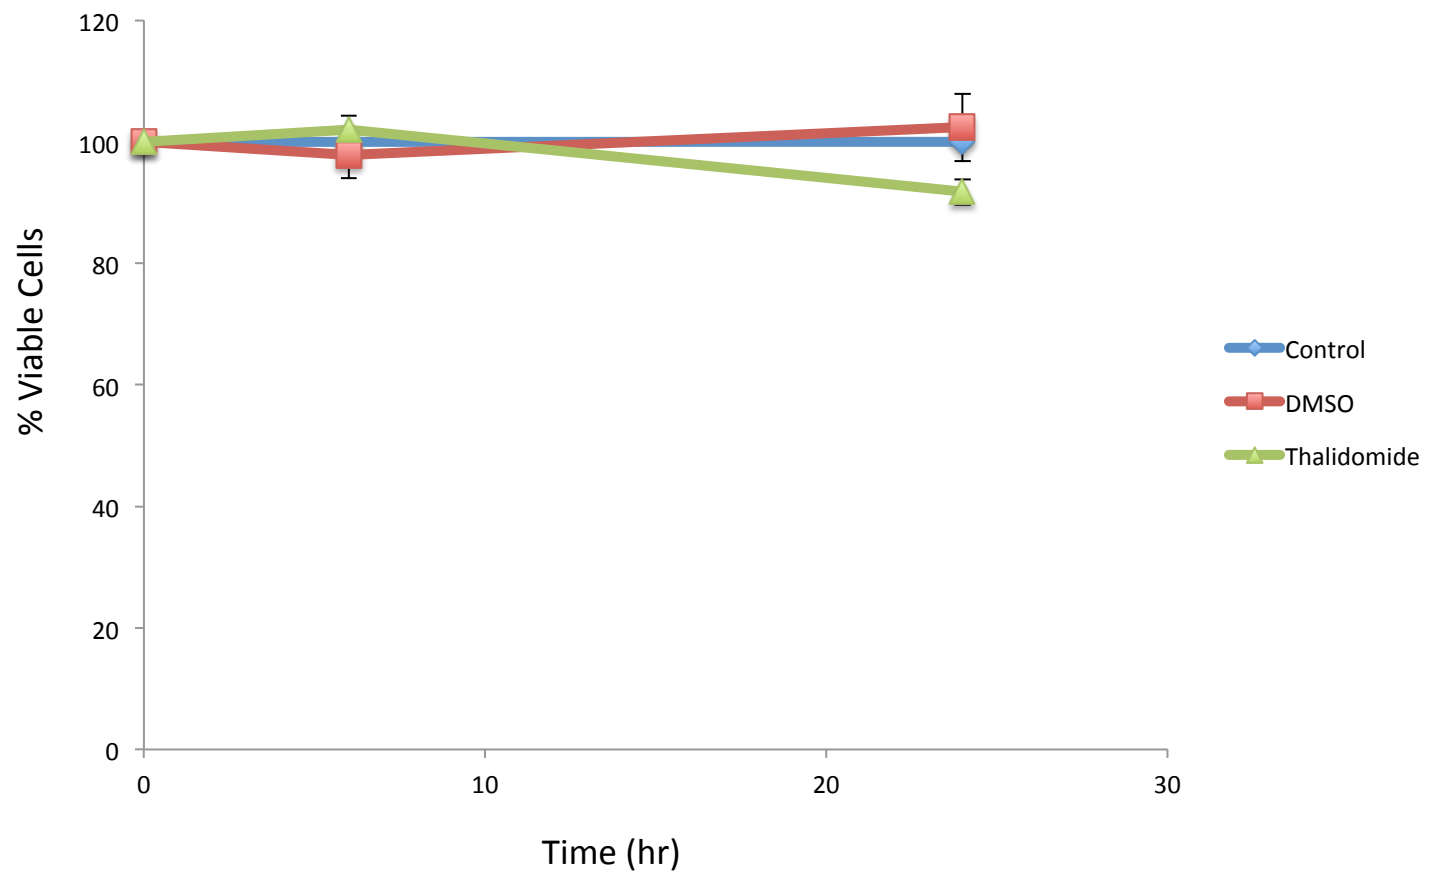

Supplement: 41598_2017_1641_MOESM1_ESM.pdf [file 41598_2017_1641_MOESM1_ESM.pdf]
